# Supplementary material for: Current Situation of Bacterial Infections and Antimicrobial Resistance Profiles in Pet Rabbits in Spain
Source: MDPI journal article supplement (doi:10.3390/vetsci10050352), 2023-05-14
Supplement: s1 [file s1]

**Supplementary Table S1.** Minimal Inhibitory Concentrations (MIC) in different bacterial isolates and antimicrobials.

| Gram-negative     |                   |                   |                   |                   |                   |                   |                   |                   |                   |                   |                   | Gram-positive     |                    |                   |                   |                   |
|-------------------|-------------------|-------------------|-------------------|-------------------|-------------------|-------------------|-------------------|-------------------|-------------------|-------------------|-------------------|-------------------|--------------------|-------------------|-------------------|-------------------|
| Acinetobacter spp |                   |                   | Pseudomonas spp   |                   | Bordetella spp    |                   | Escherichia spp   |                   | Klebsiella spp    |                   | Enterobacter spp  |                   | Staphylococcus spp |                   | Enterococcus spp  |                   |
| Ab                | MIC <sub>50</sub> | MIC <sub>90</sub> | MIC <sub>50</sub>  | MIC <sub>90</sub> | MIC <sub>50</sub> | MIC <sub>90</sub> |
| AMP               | 16                | 16                | 16                | 32                | 16                | 16                | 16                | 32                | 16                | 32                | 16                | 24                | 4                  | 8                 | 4                 | 4                 |
| AMC               | 8                 | 16                | 16                | 32                | 8                 | 8                 | 8                 | 16                | 8                 | 16                | 16                | 32                | 4                  | 8                 | 4                 | 4                 |
| LEX               | 1                 | 4                 | 1                 | 8                 | 1                 | 4                 | 1                 | 1                 | 1                 | 8                 | 1                 | 4                 | 4                  | 8                 | 4                 | 8                 |
| CTX               | 8                 | 16                | 16                | 32                | 32                | 64                | 1                 | 16                | 4                 | 32                | 1                 | 32                | 1                  | 32                | 2                 | 16                |
| IMP               | 1                 | 4                 | 1                 | 8                 | 1                 | 4                 | 1                 | 1                 | 1                 | 8                 | 1                 | 4                 | 4                  | 8                 | 4                 | 8                 |
| GEN               | 2                 | 8                 | 4                 | 8                 | 4                 | 8                 | 2                 | 8                 | 6                 | 8                 | 2                 | 8                 | 1                  | 8                 | 8                 | 8                 |
| AMK               | 8                 | 8                 | 8                 | 32                | 16                | 16                | 8                 | 16                | 8                 | 32                | 8                 | 16                | 8                  | 32                | 32                | 32                |
| CHL               | 8                 | 16                | 16                | 32                | 8                 | 27                | 8                 | 16                | 8                 | 16                | 8                 | 16                | 8                  | 8                 | 8                 | 15.2              |
| FOS               | 32                | 64                | 32                | 64                | 64                | 64                | 32                | 32                | 32                | 32                | 32                | 64                | 32                 | 32                | 32                | 32                |
| COL               | 1                 | 11.6              | 1                 | 8                 | 1                 | 4                 | 1                 | 7.2               | 1                 | 8.8               | 1                 | 23                | NA                 | NA                | NA                | NA                |
| VAN               | NA                | 1                  | 2                 | 2                 | 2.4               |

AMP, ampicillin; AMC, amoxicillin clavulanic acid; LEX, cephalixin; CTX, cefotaxime; IMP, imipenem; GEN, gentamycin; AMK, amikacin; CHL, chloramphenicol; FOS, fosfomycin; COL, colistin; VAN, vancomycin.  
NA, not applicable
